# Supplementary material for: Risk of Secondary Cancer after Adjuvant Tamoxifen Treatment for Ductal Carcinoma In Situ: A Nationwide Cohort Study in South Korea
Source: MDPI journal article supplement (doi:10.3390/diagnostics13040792), 2023-02-20
Supplement: s1 [file s1]

**Supplementary Table S1. Risk factors of all-site cancer**

| outcome         | Variable        |            | Before matching    |         |                     |         | After matching      |         |                     |         |
|-----------------|-----------------|------------|--------------------|---------|---------------------|---------|---------------------|---------|---------------------|---------|
|                 |                 |            | Univariable model  |         | Multivariable model |         | Univariable model   |         | Multivariable model |         |
|                 |                 |            | HR(95% CI)         | p-value | HR(95% CI)          | p-value | HR(95% CI)          | p-value | HR(95% CI)          | p-value |
| All-site cancer | Tamoxifen       | No         | ref                |         | ref                 |         | ref                 |         | ref                 |         |
|                 |                 | Yes        | 1.014(0.796-1.290) | 0.9131  | 1.001(0.786-1.275)  | 0.9959  | 0.953(0.720-1.261)  | 0.7342  | 0.957(0.723-1.268)  | 0.7615  |
|                 | Type of surgery | BCS        | ref                |         | ref                 |         | ref                 |         | ref                 |         |
|                 |                 | Mastectomy | 0.821(0.545-1.239) | 0.3479  | 0.806(0.534-1.218)  | 0.3064  | 0.901(0.578-1.403)  | 0.644   | 0.911(0.587-1.415)  | 0.679   |
|                 | DM              | No         | ref                |         | ref                 |         | ref                 |         | ref                 |         |
|                 |                 | Yes        | 1.231(0.878-1.727) | 0.2284  | 0.999(0.690-1.447)  | 0.9973  | 0.994(0.619-1.595)  | 0.9787  | 0.820(0.496-1.354)  | 0.4372  |
|                 | HTN             | No         | ref                |         | ref                 |         | ref                 |         | ref                 |         |
|                 |                 | Yes        | 1.398(1.077-1.815) | 0.0119  | 1.205(0.885-1.640)  | 0.2361  | 1.205(0.868-1.672)  | 0.2653  | 1.056(0.725-1.538)  | 0.7768  |
|                 | Hyperlipidemia  | No         | ref                |         | ref                 |         | ref                 |         | ref                 |         |
|                 |                 | Yes        | 1.240(0.964-1.595) | 0.094   | 1.061(0.801-1.404)  | 0.6797  | 1.260(0.927-1.712)  | 0.1406  | 1.177(0.843-1.643)  | 0.3397  |
|                 | COPD            | No         | ref                |         | ref                 |         | ref                 |         | ref                 |         |
|                 |                 | Yes        | 0.143(0.020-1.014) | 0.0516  | 0.117(0.016-0.831)  | 0.032   | 0.190(0.027-1.356)  | 0.0977  | 0.250(0.050-1.237)  | 0.0892  |
|                 | CKD             | No         | ref                |         | ref                 |         | ref                 |         | ref                 |         |
|                 |                 | Yes        | 1.263(0.405-3.940) | 0.6874  | 1.025(0.324-3.247)  | 0.9666  | 1.256(0.312-5.058)  | 0.7482  | 1.372(0.387-4.861)  | 0.6243  |
|                 | Liver cirrhosis | No         | ref                |         | ref                 |         | ref                 |         | ref                 |         |
|                 |                 | Yes        | 1.226(0.172-8.733) | 0.8389  | 0.950(0.131-6.901)  | 0.9592  | 0.970(0.060-15.683) | 0.983   | 0.914(0.058-14.348) | 0.9491  |
|                 | Heart failure   | No         | ref                |         | ref                 |         | ref                 |         | ref                 |         |
|                 |                 | Yes        | 2.117(0.875-5.124) | 0.0963  | 1.883(0.763-4.644)  | 0.1696  | 1.233(0.306-4.964)  | 0.7685  | 1.493(0.433-5.150)  | 0.5259  |
|                 | Age             |            | 1.017(1.005-1.028) | 0.0035  | 1.014(1.000-1.027)  | 0.0456  | 1.014(1.001-1.027)  | 0.036   | 1.015(0.999-1.031)  | 0.0585  |

HR, hazard ratio; CI, confidence interval; BCS, breast conserving surgery; DM, diabetes; HTN, hypertension; COPD, chronic obstructive pulmonary disease; CKD, chronic kidney disease

Yellow box highlights the p-value less than 0.05, considered significant.

**Supplementary Table S2. Risk factors of thyroid cancer**

| outcome | Variable        |       | Before matching     |         |                     |         | After matching      |         |                     |         |
|---------|-----------------|-------|---------------------|---------|---------------------|---------|---------------------|---------|---------------------|---------|
|         |                 |       | Univariable model   |         | Multivariable model |         | Univariable model   |         | Multivariable model |         |
|         |                 |       | HR(95% CI)          | p-value |
| thyroid | Tamoxifen       | No    | ref                 |         | ref                 |         | ref                 |         | ref                 |         |
|         |                 | Yes   | 1.054(0.682-1.628)  | 0.8128  | 1.026(0.663-1.587)  | 0.9081  | 0.726(0.422-1.251)  | 0.2488  | 0.730(0.423-1.257)  | 0.256   |
|         | Type of surgery | wide  | ref                 |         | ref                 |         | ref                 |         | ref                 |         |
|         |                 | total | 0.505(0.205-1.246)  | 0.1384  | 0.562(0.237-1.335)  | 0.1918  | 0.567(0.205-1.571)  | 0.2753  | 0.653(0.247-1.724)  | 0.3898  |
|         | DM              | No    | ref                 |         | ref                 |         | ref                 |         | ref                 |         |
|         |                 | Yes   | 0.964(0.499-1.861)  | 0.9122  | 0.965(0.482-1.931)  | 0.9198  | 0.539(0.168-1.727)  | 0.298   | 0.617(0.202-1.888)  | 0.3973  |
|         | HTN             | No    | ref                 |         | ref                 |         | ref                 |         | ref                 |         |
|         |                 | Yes   | 0.995(0.599-1.654)  | 0.9857  | 0.952(0.531-1.707)  | 0.8691  | 0.761(0.372-1.556)  | 0.4538  | 0.723(0.328-1.590)  | 0.4192  |
|         | Hyperlipidemia  | No    | ref                 |         | ref                 |         | ref                 |         | ref                 |         |
|         |                 | Yes   | 1.418(0.915-2.197)  | 0.1185  | 1.603(0.986-2.607)  | 0.0568  | 1.465(0.832-2.582)  | 0.1862  | 1.798(0.976-3.312)  | 0.0598  |
|         | COPD            | No    | ref                 |         | ref                 |         | ref                 |         | ref                 |         |
|         |                 | Yes   | 0.225(0.014-3.690)  | 0.2962  | 0.211(0.014-3.251)  | 0.265   | 0.343(0.021-5.691)  | 0.4551  | 0.355(0.024-5.210)  | 0.4498  |
|         | CKD             | No    | ref                 |         | ref                 |         | ref                 |         | ref                 |         |
|         |                 | Yes   | 1.281(0.178-9.191)  | 0.8058  | 1.918(0.385-9.552)  | 0.4266  | 2.253(0.311-16.292) | 0.4212  | 4.099(0.759-22.136) | 0.1011  |
|         | Liver cirrhosis | No    | ref                 |         | ref                 |         | ref                 |         | ref                 |         |
|         |                 | Yes   | 1.827(0.112-29.940) | 0.6726  | 1.122(0.074-17.008) | 0.934   | 3.417(0.206-56.665) | 0.3911  | 2.597(0.164-41.108) | 0.4982  |
|         | Heart failure   | No    | ref                 |         | ref                 |         | ref                 |         | ref                 |         |
|         |                 | Yes   | 4.102(1.297-12.975) | 0.0163  | 6.008(2.055-17.562) | 0.0011  | 4.661(1.135-19.133) | 0.0327  | 7.967(2.218-28.618) | 0.0015  |
|         | Age             |       | 0.993(0.973-1.014)  | 0.5358  | 0.988(0.965-1.012)  | 0.3314  | 0.991(0.966-1.017)  | 0.4867  | 0.992(0.963-1.022)  | 0.5937  |

HR, hazard ratio; CI, confidence interval; BCS, breast conserving surgery; DM, diabetes; HTN, hypertension; COPD, chronic obstructive pulmonary disease; CKD, chronic kidney disease

Yellow box highlights the p-value less than 0.05, considered significant.

**Supplementary Table S3. Risk factors of ovarian cancer**

| outcome | Variable        |       | Before matching     |         |                     |         | After matching       |         |                      |         |
|---------|-----------------|-------|---------------------|---------|---------------------|---------|----------------------|---------|----------------------|---------|
|         |                 |       | Univariable model   |         | Multivariable model |         | Univariable model    |         | Multivariable model  |         |
|         |                 |       | HR(95% CI)          | p-value | HR(95% CI)          | p-value | HR(95% CI)           | p-value | HR(95% CI)           | p-value |
| ovary   | Tamoxifen       | No    | ref                 |         | ref                 |         | ref                  |         | ref                  |         |
|         |                 | Yes   | 1.059(0.570-1.969)  | 0.8562  | 1.049(0.564-1.950)  | 0.8807  | 1.004(0.484-2.083)   | 0.9918  | 0.999(0.481-2.074)   | 0.998   |
|         | Type of surgery | wide  | ref                 |         | ref                 |         | ref                  |         | ref                  |         |
|         |                 | total | 0.885(0.316-2.476)  | 0.8156  | 0.971(0.362-2.600)  | 0.9529  | 1.157(0.402-3.324)   | 0.787   | 1.361(0.493-3.751)   | 0.5518  |
|         | DM              | No    | ref                 |         | ref                 |         | ref                  |         | ref                  |         |
|         |                 | Yes   | 0.796(0.284-2.228)  | 0.6639  | 0.813(0.290-2.275)  | 0.6927  | 0.333(0.045-2.445)   | 0.2795  | 0.607(0.120-3.060)   | 0.545   |
|         | HTN             | No    | ref                 |         | ref                 |         | ref                  |         | ref                  |         |
|         |                 | Yes   | 1.567(0.817-3.003)  | 0.1763  | 2.047(0.952-4.403)  | 0.0667  | 0.791(0.302-2.074)   | 0.6339  | 1.215(0.433-3.408)   | 0.7118  |
|         | Hyperlipidemia  | No    | ref                 |         | ref                 |         | ref                  |         | ref                  |         |
|         |                 | Yes   | 1.061(0.543-2.070)  | 0.8632  | 1.067(0.512-2.225)  | 0.8629  | 0.944(0.402-2.212)   | 0.8938  | 1.291(0.527-3.162)   | 0.5759  |
|         | COPD            | No    | ref                 |         | ref                 |         | ref                  |         | ref                  |         |
|         |                 | Yes   | 0.485(0.029-8.147)  | 0.615   | 0.474(0.032-7.062)  | 0.5881  | 0.646(0.038-11.105)  | 0.7635  | 0.770(0.055-10.718)  | 0.8459  |
|         | CKD             | No    | ref                 |         | ref                 |         | ref                  |         | ref                  |         |
|         |                 | Yes   | 2.931(0.403-21.321) | 0.2883  | 3.561(0.681-18.626) | 0.1324  | 2.085(0.121-35.899)  | 0.6128  | 2.252(0.126-40.203)  | 0.5809  |
|         | Liver cirrhosis | No    | ref                 |         | ref                 |         | ref                  |         | ref                  |         |
|         |                 | Yes   | 3.992(0.237-67.220) | 0.3366  | 2.514(0.168-37.698) | 0.5046  | 6.552(0.380-112.958) | 0.1957  | 7.918(0.542-115.620) | 0.1304  |
|         | Heart failure   | No    | ref                 |         | ref                 |         | ref                  |         | ref                  |         |
|         |                 | Yes   | 2.633(0.362-19.136) | 0.3386  | 4.007(0.814-19.738) | 0.0879  | 1.876(0.109-32.251)  | 0.6646  | 2.230(0.166-30.052)  | 0.5455  |
|         | Age             |       | 0.988(0.959-1.018)  | 0.4386  | 0.978(0.945-1.012)  | 0.2023  | 0.976(0.941-1.012)   | 0.1868  | 0.978(0.939-1.019)   | 0.2969  |

HR, hazard ratio; CI, confidence interval; BCS, breast conserving surgery; DM, diabetes; HTN, hypertension; COPD, chronic obstructive pulmonary disease; CKD, chronic kidney disease

Yellow box highlights the p-value less than 0.05, considered significant.

**Supplementary Table S4. Risk factors of melanoma**

| outcome  | Variable        |       | Before matching       |         |                       |         | After matching        |         |                       |         |
|----------|-----------------|-------|-----------------------|---------|-----------------------|---------|-----------------------|---------|-----------------------|---------|
|          |                 |       | Univariable model     |         | Multivariable model   |         | Univariable model     |         | Multivariable model   |         |
|          |                 |       | HR(95% CI)            | P-value |
| melanoma | Tamoxifen       | No    | ref                   |         | ref                   |         | ref                   |         | ref                   |         |
|          |                 | Yes   | 0.409(0.068-2.458)    | 0.3287  | 0.463(0.070-3.073)    | 0.4249  | 0.723(0.120-4.344)    | 0.7229  | 0.779(0.122-4.983)    | 0.7923  |
|          | Type of surgery | wide  | ref                   |         | ref                   |         | ref                   |         | ref                   |         |
|          |                 | total | 2.159(0.241-19.325)   | 0.4913  | 2.718(0.336-21.984)   | 0.3484  | 1.812(0.202-16.218)   | 0.5952  | 2.608(0.318-21.411)   | 0.3721  |
|          | DM              | No    | ref                   |         | ref                   |         | ref                   |         | ref                   |         |
|          |                 | Yes   | 1.926(0.215-17.266)   | 0.558   | 5.903(0.562-61.943)   | 0.1388  | 2.364(0.264-21.190)   | 0.442   | 6.354(0.578-69.896)   | 0.1307  |
|          | HTN             | No    | ref                   |         | ref                   |         | ref                   |         | ref                   |         |
|          |                 | Yes   | 0.329(0.014-7.856)    | 0.4923  | 0.264(0.017-4.151)    | 0.3434  | 0.349(0.015-8.327)    | 0.5153  | 0.205(0.008-5.221)    | 0.3371  |
|          | Hyperlipidemia  | No    | ref                   |         | ref                   |         | ref                   |         | ref                   |         |
|          |                 | Yes   | 0.243(0.010-5.843)    | 0.3834  | 0.215(0.012-3.865)    | 0.2968  | 0.272(0.011-6.537)    | 0.4224  | 0.292(0.020-4.352)    | 0.3716  |
|          | COPD            | No    | ref                   |         | ref                   |         | ref                   |         | ref                   |         |
|          |                 | Yes   | 3.832(0.159-92.413)   | 0.4081  | 2.335(0.076-71.480)   | 0.6272  | 3.531(0.147-84.613)   | 0.4364  | 1.478(0.036-60.278)   | 0.8365  |
|          | CKD             | No    | ref                   |         | ref                   |         | ref                   |         | ref                   |         |
|          |                 | Yes   | 10.747(0.443-260.849) | 0.1445  | 10.322(0.406-262.444) | 0.1574  | 11.403(0.474-274.558) | 0.1337  | 12.089(0.372-392.574) | 0.1605  |
|          | Liver cirrhosis | No    | ref                   |         | ref                   |         | ref                   |         | ref                   |         |
|          |                 | Yes   | 31.559(1.290-771.791) | 0.0343  | 16.043(0.334-769.491) | 0.1599  | 37.176(1.505-918.122) | 0.0271  | 6.583(0.049-875.782)  | 0.4501  |
|          | Heart failure   | No    | ref                   |         | ref                   |         | ref                   |         | ref                   |         |
|          |                 | Yes   | 10.501(0.438-251.492) | 0.1467  | 4.348(0.112-168.093)  | 0.4306  | 10.497(0.440-250.618) | 0.1464  | 21.454(0.468-984.069) | 0.1163  |
|          | Age             |       | 0.988(0.904-1.079)    | 0.7848  | 1.013(0.926-1.109)    | 0.7781  | 0.992(0.911-1.079)    | 0.8441  | 1.012(0.928-1.103)    | 0.7856  |

HR, hazard ratio; CI, confidence interval; BCS, breast conserving surgery; DM, diabetes; HTN, hypertension; COPD, chronic obstructive pulmonary disease; CKD, chronic kidney disease

Yellow box highlights the p-value less than 0.05, considered significant.

**Supplementary Table S5. Risk factors of thoracic cancer\***

| outcome | Variable        |       | Before matching        |         |                         |         | After matching    |         |                     |         |
|---------|-----------------|-------|------------------------|---------|-------------------------|---------|-------------------|---------|---------------------|---------|
|         |                 |       | Univariable model      |         | Multivariable model     |         | Univariable model |         | Multivariable model |         |
|         |                 |       | HR(95% CI)             | P-value | HR(95% CI)              | p-value | HR(95% CI)        | p-value | HR(95% CI)          | p-value |
| thorax  | Tamoxifen       | No    | ref                    |         | ref                     |         |                   |         |                     |         |
|         |                 | Yes   | 1.897(0.020-184.083)   | 0.7838  | 2.777(0.015-513.123)    | 0.7013  |                   |         |                     |         |
|         | Type of surgery | wide  | ref                    |         | ref                     |         |                   |         |                     |         |
|         |                 | total | 2.843(0.030-265.184)   | 0.6516  | 2.650(0.011-623.442)    | 0.7264  |                   |         |                     |         |
|         | DM              | No    | ref                    |         | ref                     |         |                   |         |                     |         |
|         |                 | Yes   | 2.446(0.026-226.868)   | 0.6987  | 0.105(0.000-50.012)     | 0.4732  |                   |         |                     |         |
|         | HTN             | No    | ref                    |         | ref                     |         |                   |         |                     |         |
|         |                 | Yes   | 10.700(0.115-994.421)  | 0.3053  | 1.986(0.009-460.779)    | 0.8051  |                   |         |                     |         |
|         | Hyperlipidemia  | No    | ref                    |         | ref                     |         |                   |         |                     |         |
|         |                 | Yes   | 7.931(0.085-736.887)   | 0.3705  | 5.109(0.025-1038.337)   | 0.5475  |                   |         |                     |         |
|         | COPD            | No    | ref                    |         | ref                     |         |                   |         |                     |         |
|         |                 | Yes   | 13.062(0.141-1214.214) | 0.2665  | 5.830(0.013-2535.920)   | 0.5695  |                   |         |                     |         |
|         | CKD             | No    | ref                    |         | ref                     |         |                   |         |                     |         |
|         |                 | Yes   | 36.445(0.397-3348.581) | 0.119   | 25.630(0.064-10344.24)  | 0.2894  |                   |         |                     |         |
|         | Liver cirrhosis | No    | ref                    |         | ref                     |         |                   |         |                     |         |
|         |                 | Yes   | 99.915(1.061-9411.537) | 0.0471  | 27.876(0.011-73899.20)  | 0.408   |                   |         |                     |         |
|         | Heart failure   | No    |                        |         | ref                     |         |                   |         |                     |         |
|         |                 | Yes   |                        |         | 146.764(0.927-23245.50) | 0.0535  |                   |         |                     |         |
|         | Age             |       | 1.103(0.931-1.307)     | 0.2556  | 1.026(0.820-1.285)      | 0.8204  |                   |         |                     |         |

HR, hazard ratio; CI, confidence interval; BCS, breast conserving surgery; DM, diabetes; HTN, hypertension; COPD, chronic obstructive pulmonary disease; CKD, chronic kidney disease

Yellow box highlights the p-value less than 0.05, considered significant.

\*The number of events were too small, matched analysis was not conducted.

**Supplementary Table S6. Risk factors of gastrointestinal cancer**

| outcome              | Variable        |       | Before matching     |         |                     |         | After matching      |         |                     |         |
|----------------------|-----------------|-------|---------------------|---------|---------------------|---------|---------------------|---------|---------------------|---------|
|                      |                 |       | Univariable model   |         | Multivariable model |         | Univariable model   |         | Multivariable model |         |
|                      |                 |       | HR(95% CI)          | p-value |
| all gastrointestinal | Tamoxifen       | No    | ref                 |         | ref                 |         | ref                 |         | ref                 |         |
|                      |                 | Yes   | 0.887(0.551-1.429)  | 0.6232  | 0.877(0.544-1.414)  | 0.5899  | 0.940(0.545-1.624)  | 0.8258  | 0.939(0.544-1.623)  | 0.8224  |
|                      | Type of surgery | wide  | ref                 |         | ref                 |         | ref                 |         | ref                 |         |
|                      |                 | total | 1.249(0.620-2.515)  | 0.5336  | 1.249(0.627-2.491)  | 0.5269  | 1.300(0.612-2.762)  | 0.4946  | 1.295(0.617-2.718)  | 0.4941  |
|                      | DM              | No    | ref                 |         | ref                 |         | ref                 |         | ref                 |         |
|                      |                 | Yes   | 1.599(0.858-2.979)  | 0.1391  | 1.227(0.628-2.400)  | 0.5494  | 1.216(0.519-2.848)  | 0.6526  | 0.859(0.357-2.064)  | 0.7334  |
|                      | HTN             | No    | ref                 |         | ref                 |         | ref                 |         | ref                 |         |
|                      |                 | Yes   | 1.672(1.010-2.770)  | 0.0459  | 1.303(0.717-2.369)  | 0.3857  | 1.557(0.855-2.837)  | 0.148   | 1.200(0.600-2.400)  | 0.6064  |
|                      | Hyperlipidemia  | No    | ref                 |         | ref                 |         | ref                 |         | ref                 |         |
|                      |                 | Yes   | 1.164(0.697-1.943)  | 0.5625  | 0.821(0.465-1.448)  | 0.4953  | 1.347(0.746-2.430)  | 0.3231  | 1.055(0.556-2.004)  | 0.8695  |
|                      | COPD            | No    | ref                 |         | ref                 |         | ref                 |         | ref                 |         |
|                      |                 | Yes   | 0.598(0.083-4.304)  | 0.6093  | 0.652(0.130-3.277)  | 0.6036  | 0.753(0.104-5.444)  | 0.7783  | 0.827(0.163-4.195)  | 0.819   |
|                      | CKD             | No    | ref                 |         | ref                 |         | ref                 |         | ref                 |         |
|                      |                 | Yes   | 0.814(0.049-13.411) | 0.8853  | 0.444(0.028-7.021)  | 0.5642  | 1.154(0.069-19.210) | 0.9207  | 0.838(0.050-14.183) | 0.9027  |
|                      | Liver cirrhosis | No    | ref                 |         | ref                 |         | ref                 |         | ref                 |         |
|                      |                 | Yes   | 5.137(0.713-37.024) | 0.1044  | 9.166(1.907-44.059) | 0.0057  | 3.751(0.224-62.665) | 0.3575  | 4.082(0.270-61.697) | 0.31    |
|                      | Heart failure   | No    | ref                 |         | ref                 |         | ref                 |         | ref                 |         |
|                      |                 | Yes   | 0.787(0.048-12.963) | 0.8668  | 0.388(0.026-5.885)  | 0.4947  | 1.070(0.064-17.819) | 0.9625  | 0.736(0.052-10.388) | 0.8207  |
|                      | Age             |       | 1.034(1.012-1.057)  | 0.002   | 1.033(1.007-1.060)  | 0.0133  | 1.033(1.008-1.059)  | 0.0087  | 1.034(1.005-1.065)  | 0.0236  |

HR, hazard ratio; CI, confidence interval; BCS, breast conserving surgery; DM, diabetes; HTN, hypertension; COPD, chronic obstructive pulmonary disease; CKD, chronic kidney disease

Yellow box highlights the p-value less than 0.05, considered significant.

**Supplementary Table S7. Risk factors of gastric cancer**

| outcome | Variable        |       | Before matching      |         |                      |         | After matching        |         |                       |         |
|---------|-----------------|-------|----------------------|---------|----------------------|---------|-----------------------|---------|-----------------------|---------|
|         |                 |       | Univariable model    |         | Multivariable model  |         | Univariable model     |         | Multivariable model   |         |
|         |                 |       | HR(95% CI)           | p-value | HR(95% CI)           | p-value | HR(95% CI)            | P-value | HR(95% CI)            | p-value |
| gastric | Tamoxifen       | No    | ref                  |         | ref                  |         | ref                   |         | ref                   |         |
|         |                 | Yes   | 0.762(0.309-1.880)   | 0.5549  | 0.753(0.303-1.871)   | 0.5407  | 0.652(0.218-1.950)    | 0.4437  | 0.656(0.217-1.978)    | 0.4537  |
|         | Type of surgery | wide  | ref                  |         | ref                  |         | ref                   |         | ref                   |         |
|         |                 | total | 1.022(0.236-4.424)   | 0.9772  | 1.036(0.267-4.026)   | 0.9588  | 1.217(0.272-5.437)    | 0.7974  | 1.291(0.315-5.301)    | 0.7228  |
|         | DM              | No    | ref                  |         | ref                  |         | ref                   |         | ref                   |         |
|         |                 | Yes   | 0.962(0.222-4.167)   | 0.9587  | 0.626(0.158-2.477)   | 0.505   | 0.748(0.098-5.721)    | 0.7798  | 0.505(0.088-2.898)    | 0.4434  |
|         | HTN             | No    | ref                  |         | ref                  |         | ref                   |         | ref                   |         |
|         |                 | Yes   | 2.162(0.851-5.491)   | 0.1051  | 1.587(0.541-4.653)   | 0.4005  | 2.165(0.726-6.462)    | 0.1661  | 1.672(0.482-5.801)    | 0.418   |
|         | Hyperlipidemia  | No    | ref                  |         | ref                  |         | ref                   |         | ref                   |         |
|         |                 | Yes   | 0.797(0.264-2.411)   | 0.6884  | 0.494(0.159-1.536)   | 0.2228  | 0.889(0.247-3.195)    | 0.8564  | 0.570(0.156-2.083)    | 0.3953  |
|         | COPD            | No    | ref                  |         | ref                  |         | ref                   |         | ref                   |         |
|         |                 | Yes   | 2.510(0.334-18.836)  | 0.3709  | 2.457(0.442-13.650)  | 0.3044  | 3.110(0.406-23.793)   | 0.2745  | 3.039(0.533-17.330)   | 0.2109  |
|         | CKD             | No    | ref                  |         | ref                  |         | ref                   |         | ref                   |         |
|         |                 | Yes   | 3.343(0.186-60.007)  | 0.4127  | 2.244(0.137-36.905)  | 0.5714  | 4.606(0.247-85.846)   | 0.3061  | 3.542(0.177-70.955)   | 0.4083  |
|         | Liver cirrhosis | No    | ref                  |         | ref                  |         | ref                   |         | ref                   |         |
|         |                 | Yes   | 9.511(0.524-172.536) | 0.1277  | 9.769(0.617-154.716) | 0.1059  | 15.566(0.816-296.791) | 0.068   | 17.616(0.817-379.873) | 0.0671  |
|         | Heart failure   | No    | ref                  |         | ref                  |         | ref                   |         | ref                   |         |
|         |                 | Yes   | 3.019(0.169-53.896)  | 0.4523  | 1.153(0.070-18.877)  | 0.9205  | 4.083(0.220-75.727)   | 0.3451  | 1.485(0.082-26.792)   | 0.7889  |
|         | Age             |       | 1.060(1.019-1.102)   | 0.0038  | 1.068(1.020-1.117)   | 0.0046  | 1.054(1.007-1.103)    | 0.0242  | 1.061(1.007-1.118)    | 0.0267  |

HR, hazard ratio; CI, confidence interval; BCS, breast conserving surgery; DM, diabetes; HTN, hypertension; COPD, chronic obstructive pulmonary disease; CKD, chronic kidney disease

Yellow box highlights the p-value less than 0.05, considered significant.

**Supplementary Table S8. Risk factors of colorectal cancer**

| outcome    | Variable        |       | Before matching      |         |                       |         | After matching        |         |                       |         |
|------------|-----------------|-------|----------------------|---------|-----------------------|---------|-----------------------|---------|-----------------------|---------|
|            |                 |       | Univariable model    |         | Multivariable model   |         | Univariable model     |         | Multivariable model   |         |
|            |                 |       | HR(95% CI)           | P-value | HR(95% CI)            | p-value | HR(95% CI)            | P-value | HR(95% CI)            | p-value |
| colorectal | Tamoxifen       | No    | ref                  |         | ref                   |         | ref                   |         | ref                   |         |
|            |                 | Yes   | 1.451(0.511-4.123)   | 0.485   | 1.475(0.527-4.126)    | 0.4592  | 1.470(0.466-4.637)    | 0.5109  | 1.405(0.445-4.436)    | 0.5625  |
|            | Type of surgery | wide  | ref                  |         | ref                   |         | ref                   |         | ref                   |         |
|            |                 | total | 2.569(0.838-7.877)   | 0.0989  | 2.699(0.897-8.121)    | 0.0772  | 2.342(0.634-8.649)    | 0.2019  | 2.513(0.690-9.147)    | 0.1622  |
|            | DM              | No    | ref                  |         | ref                   |         | ref                   |         | ref                   |         |
|            |                 | Yes   | 1.000(0.229-4.373)   | >.9999  | 1.619(0.395-6.640)    | 0.5035  | 0.825(0.106-6.388)    | 0.8536  | 1.299(0.217-7.788)    | 0.775   |
|            | HTN             | No    | ref                  |         | ref                   |         | ref                   |         | ref                   |         |
|            |                 | Yes   | 0.774(0.222-2.694)   | 0.6874  | 1.102(0.298-4.073)    | 0.8847  | 0.761(0.167-3.474)    | 0.7247  | 1.052(0.224-4.939)    | 0.9486  |
|            | Hyperlipidemia  | No    | ref                  |         | ref                   |         | ref                   |         | ref                   |         |
|            |                 | Yes   | 0.074(0.004-1.332)   | 0.0775  | 0.051(0.004-0.682)    | 0.0244  | 0.115(0.006-2.176)    | 0.1492  | 0.079(0.005-1.149)    | 0.0631  |
|            | COPD            | No    | ref                  |         | ref                   |         | ref                   |         | ref                   |         |
|            |                 | Yes   | 1.134(0.063-20.485)  | 0.9322  | 0.966(0.066-14.086)   | 0.9796  | 1.482(0.078-28.081)   | 0.7934  | 1.010(0.060-17.058)   | 0.9943  |
|            | CKD             | No    | ref                  |         | ref                   |         | ref                   |         | ref                   |         |
|            |                 | Yes   | 3.151(0.175-56.896)  | 0.4368  | 4.787(0.296-77.518)   | 0.2704  | 4.618(0.243-87.665)   | 0.3083  | 6.584(0.328-132.006)  | 0.218   |
|            | Liver cirrhosis | No    | ref                  |         | ref                   |         | ref                   |         | ref                   |         |
|            |                 | Yes   | 8.852(0.490-160.063) | 0.1398  | 12.661(0.859-186.529) | 0.0644  | 14.585(0.768-277.116) | 0.0744  | 16.289(0.851-311.613) | 0.0639  |
|            | Heart failure   | No    | ref                  |         | ref                   |         | ref                   |         | ref                   |         |
|            |                 | Yes   | 3.218(0.178-58.101)  | 0.4286  | 2.464(0.154-39.428)   | 0.5239  | 4.670(0.246-88.769)   | 0.3051  | 3.292(0.168-64.638)   | 0.4328  |
|            | Age             |       | 1.013(0.968-1.060)   | 0.5745  | 1.037(0.987-1.090)    | 0.1486  | 1.021(0.969-1.075)    | 0.4404  | 1.047(0.989-1.108)    | 0.1134  |

HR, hazard ratio; CI, confidence interval; BCS, breast conserving surgery; DM, diabetes; HTN, hypertension; COPD, chronic obstructive pulmonary disease; CKD, chronic kidney disease

Yellow box highlights the p-value less than 0.05, considered significant.



**Supplementary Table S9. Risk factors of bladder cancer**

| outcome | Variable        |       | Before matching       |         |                       |         | After matching        |         |                        |         |
|---------|-----------------|-------|-----------------------|---------|-----------------------|---------|-----------------------|---------|------------------------|---------|
|         |                 |       | Univariable model     |         | Multivariable model   |         | Univariable model     |         | Multivariable model    |         |
|         |                 |       | HR(95% CI)            | P-value | HR(95% CI)            | p-value | HR(95% CI)            | P-value | HR(95% CI)             | p-value |
| bladder | Tamoxifen       | No    | ref                   |         | ref                   |         | ref                   |         | ref                    |         |
|         |                 | Yes   | 0.664(0.133-3.313)    | 0.618   | 0.703(0.132-3.753)    | 0.6805  | 0.807(0.134-4.865)    | 0.8147  | 0.925(0.140-6.129)     | 0.9358  |
|         | Type of surgery | wide  | ref                   |         | ref                   |         | ref                   |         | ref                    |         |
|         |                 | total | 0.682(0.030-15.276)   | 0.8091  | 0.547(0.028-10.753)   | 0.6916  | 0.692(0.029-16.540)   | 0.82    | 0.511(0.022-12.135)    | 0.6781  |
|         | DM              | No    | ref                   |         | ref                   |         | ref                   |         | ref                    |         |
|         |                 | Yes   | 0.625(0.028-14.058)   | 0.7672  | 0.279(0.017-4.579)    | 0.3711  | 0.913(0.038-21.971)   | 0.9555  | 0.249(0.010-5.905)     | 0.3894  |
|         | HTN             | No    | ref                   |         | ref                   |         | ref                   |         | ref                    |         |
|         |                 | Yes   | 0.725(0.085-6.204)    | 0.769   | 0.554(0.074-4.174)    | 0.5669  | 0.954(0.107-8.536)    | 0.9667  | 0.630(0.075-5.280)     | 0.67    |
|         | Hyperlipidemia  | No    | ref                   |         | ref                   |         | ref                   |         | ref                    |         |
|         |                 | Yes   | 0.591(0.068-5.096)    | 0.6319  | 0.573(0.081-4.062)    | 0.5773  | 0.849(0.094-7.660)    | 0.8841  | 0.712(0.092-5.508)     | 0.7449  |
|         | COPD            | No    | ref                   |         | ref                   |         | ref                   |         | ref                    |         |
|         |                 | Yes   | 3.556(0.156-81.043)   | 0.4264  | 2.804(0.131-60.226)   | 0.51    | 4.000(0.165-96.944)   | 0.3941  | 2.548(0.101-64.351)    | 0.5702  |
|         | CKD             | No    | ref                   |         | ref                   |         | ref                   |         | ref                    |         |
|         |                 | Yes   | 9.616(0.423-218.462)  | 0.1555  | 10.593(0.466-240.632) | 0.1386  | 12.296(0.510-296.657) | 0.1224  | 11.942(0.366-389.319)  | 0.163   |
|         | Liver cirrhosis | No    | ref                   |         | ref                   |         | ref                   |         | ref                    |         |
|         |                 | Yes   | 28.512(1.235-658.368) | 0.0365  | 25.087(0.900-699.413) | 0.0577  | 39.010(1.571-968.890) | 0.0254  | 45.291(1.049-1956.075) | 0.0472  |
|         | Heart failure   | No    | ref                   |         | ref                   |         | ref                   |         | ref                    |         |
|         |                 | Yes   | 8.357(0.371-188.057)  | 0.1814  | 4.370(0.183-104.286)  | 0.3622  | 9.573(0.396-231.363)  | 0.1645  | 3.194(0.086-118.987)   | 0.5293  |
|         | Age             |       | 1.059(0.988-1.135)    | 0.1039  | 1.099(1.016-1.190)    | 0.019   | 1.071(0.995-1.153)    | 0.0677  | 1.109(1.014-1.212)     | 0.0228  |

HR, hazard ratio; CI, confidence interval; BCS, breast conserving surgery; DM, diabetes; HTN, hypertension; COPD, chronic obstructive pulmonary disease; CKD, chronic kidney disease

Yellow box highlights the p-value less than 0.05, considered significant.

**Supplementary Table S10. Risk factors of head and neck cancer**

| outcome       | Variable        |       | Before matching         |         |                        |         | After matching          |         |                        |         |
|---------------|-----------------|-------|-------------------------|---------|------------------------|---------|-------------------------|---------|------------------------|---------|
|               |                 |       | Univariable model       |         | Multivariable model    |         | Univariable model       |         | Multivariable model    |         |
|               |                 |       | HR(95% CI)              | P-value | HR(95% CI)             | p-value | HR(95% CI)              | P-value | HR(95% CI)             | p-value |
| head and neck | Tamoxifen       | No    | ref                     |         | ref                    |         | ref                     |         | ref                    |         |
|               |                 | Yes   | 3.768(0.091-155.351)    | 0.4845  | 3.668(0.109-123.552)   | 0.4689  | 3.840(0.042-349.623)    | 0.5589  | 4.942(0.033-744.797)   | 0.5324  |
|               | Type of surgery | wide  | ref                     |         | ref                    |         | ref                     |         | ref                    |         |
|               |                 | total | 1.688(0.041-69.541)     | 0.7826  | 1.379(0.030-64.084)    | 0.8697  | 2.410(0.026-223.320)    | 0.7035  | 1.392(0.011-180.850)   | 0.8941  |
|               | DM              | No    | ref                     |         | ref                    |         | ref                     |         | ref                    |         |
|               |                 | Yes   | 1.762(0.043-72.600)     | 0.7652  | 0.352(0.005-24.659)    | 0.6299  | 3.356(0.036-315.133)    | 0.6013  | 0.347(0.002-75.059)    | 0.6995  |
|               | HTN             | No    | ref                     |         | ref                    |         | ref                     |         | ref                    |         |
|               |                 | Yes   | 3.769(0.236-60.253)     | 0.3482  | 1.680(0.065-43.615)    | 0.7549  | 12.296(0.132-1148.960)  | 0.2784  | 2.664(0.019-365.184)   | 0.6963  |
|               | Hyperlipidemia  | No    | ref                     |         | ref                    |         | ref                     |         | ref                    |         |
|               |                 | Yes   | 3.312(0.207-52.954)     | 0.3971  | 2.101(0.107-41.207)    | 0.6248  | 10.626(0.114-988.466)   | 0.3068  | 4.928(0.048-511.074)   | 0.5006  |
|               | COPD            | No    | ref                     |         | ref                    |         | ref                     |         | ref                    |         |
|               |                 | Yes   | 9.160(0.222-377.486)    | 0.2431  | 6.466(0.072-583.572)   | 0.4165  | 12.864(0.138-1197.210)  | 0.2694  | 7.269(0.017-3021.481)  | 0.5191  |
|               | CKD             | No    | ref                     |         | ref                    |         | ref                     |         | ref                    |         |
|               |                 | Yes   | 30.604(0.741-1263.181)  | 0.0715  | 23.843(0.213-2665.167) | 0.1875  | 44.628(0.488-4083.940)  | 0.0993  | 22.799(0.046-11388.61) | 0.324   |
|               | Liver cirrhosis | No    | ref                     |         | ref                    |         | ref                     |         | ref                    |         |
|               |                 | Yes   | 119.992(2.851-5049.957) | 0.0121  | 6.889(0.006-7595.991)  | 0.5892  | 206.684(2.224-19204.77) | 0.0211  | 192.741(0.035-1066198) | 0.2315  |
|               | Heart failure   | No    | ref                     |         | ref                    |         | ref                     |         | ref                    |         |
|               |                 | Yes   | 28.638(0.694-1181.075)  | 0.0771  | 25.828(0.294-2268.382) | 0.1545  | 48.188(0.528-4399.347)  | 0.0925  | 36.974(0.078-17577.62) | 0.251   |
|               | Age             |       | 1.058(0.937-1.195)      | 0.3594  | 1.064(0.924-1.227)     | 0.3887  | 1.154(0.971-1.372)      | 0.1035  | 1.118(0.896-1.394)     | 0.3239  |

HR, hazard ratio; CI, confidence interval; BCS, breast conserving surgery; DM, diabetes; HTN, hypertension; COPD, chronic obstructive pulmonary disease; CKD, chronic kidney disease

Yellow box highlights the p-value less than 0.05, considered significant.

**Supplementary Table S11. Risk factors of lung cancer**

| outcome | Variable        |       | Before matching     |         |                     |         | After matching       |         |                      |         |
|---------|-----------------|-------|---------------------|---------|---------------------|---------|----------------------|---------|----------------------|---------|
|         |                 |       | Univariable model   |         | Multivariable model |         | Univariable model    |         | Multivariable model  |         |
|         |                 |       | HR(95% CI)          | p-value | HR(95% CI)          | p-value | HR(95% CI)           | p-value | HR(95% CI)           | p-value |
| lung    | Tamoxifen       | No    | ref                 |         | ref                 |         | ref                  |         | ref                  |         |
|         |                 | Yes   | 0.991(0.496-1.983)  | 0.9806  | 0.975(0.484-1.962)  | 0.9425  | 1.088(0.503-2.353)   | 0.8295  | 1.098(0.506-2.385)   | 0.813   |
|         | Type of surgery | wide  | ref                 |         | ref                 |         | ref                  |         | ref                  |         |
|         |                 | total | 1.139(0.401-3.234)  | 0.8067  | 1.197(0.441-3.252)  | 0.724   | 0.944(0.283-3.146)   | 0.9257  | 1.067(0.342-3.327)   | 0.9116  |
|         | DM              | No    | ref                 |         | ref                 |         | ref                  |         | ref                  |         |
|         |                 | Yes   | 2.333(1.056-5.156)  | 0.0362  | 1.771(0.740-4.235)  | 0.1991  | 1.674(0.577-4.861)   | 0.3431  | 1.759(0.575-5.386)   | 0.3225  |
|         | HTN             | No    | ref                 |         | ref                 |         | ref                  |         | ref                  |         |
|         |                 | Yes   | 1.305(0.609-2.796)  | 0.4935  | 0.676(0.281-1.629)  | 0.3833  | 0.501(0.150-1.668)   | 0.26    | 0.343(0.102-1.159)   | 0.085   |
|         | Hyperlipidemia  | No    | ref                 |         | ref                 |         | ref                  |         | ref                  |         |
|         |                 | Yes   | 1.458(0.720-2.952)  | 0.2947  | 1.045(0.484-2.254)  | 0.9108  | 0.898(0.360-2.239)   | 0.8167  | 0.837(0.327-2.140)   | 0.7106  |
|         | COPD            | No    | ref                 |         | ref                 |         | ref                  |         | ref                  |         |
|         |                 | Yes   | 0.587(0.035-9.952)  | 0.7123  | 0.331(0.021-5.276)  | 0.4337  | 0.713(0.041-12.362)  | 0.8164  | 0.613(0.042-9.032)   | 0.7211  |
|         | CKD             | No    | ref                 |         | ref                 |         | ref                  |         | ref                  |         |
|         |                 | Yes   | 1.604(0.094-27.281) | 0.744   | 0.971(0.064-14.714) | 0.9831  | 2.180(0.125-37.875)  | 0.5927  | 1.748(0.092-33.126)  | 0.7099  |
|         | Liver cirrhosis | No    | ref                 |         | ref                 |         | ref                  |         | ref                  |         |
|         |                 | Yes   | 4.702(0.276-80.187) | 0.2848  | 2.866(0.175-46.928) | 0.4605  | 7.272(0.417-126.816) | 0.1738  | 7.576(0.468-122.691) | 0.1541  |
|         | Heart failure   | No    | ref                 |         | ref                 |         | ref                  |         | ref                  |         |
|         |                 | Yes   | 3.307(0.452-24.195) | 0.2388  | 3.559(0.701-18.073) | 0.1257  | 2.036(0.116-35.583)  | 0.6263  | 2.166(0.143-32.726)  | 0.577   |
|         | Age             |       | 1.047(1.016-1.079)  | 0.0026  | 1.049(1.012-1.088)  | 0.0083  | 1.030(0.995-1.066)   | 0.0956  | 1.049(1.007-1.092)   | 0.021   |

HR, hazard ratio; CI, confidence interval; BCS, breast conserving surgery; DM, diabetes; HTN, hypertension; COPD, chronic obstructive pulmonary disease; CKD, chronic kidney disease

Yellow box highlights the p-value less than 0.05, considered significant.

**Supplementary Table S12. Risk factors of leukemia**

| outcome  | Variable        |       | Before matching        |         |                        |         | After matching          |         |                        |         |
|----------|-----------------|-------|------------------------|---------|------------------------|---------|-------------------------|---------|------------------------|---------|
|          |                 |       | Univariable model      |         | Multivariable model    |         | Univariable model       |         | Multivariable model    |         |
|          |                 |       | HR(95% CI)             | P-value | HR(95% CI)             | p-value | HR(95% CI)              | P-value | HR(95% CI)             | p-value |
| leukemia | Tamoxifen       | No    | ref                    |         | ref                    |         | ref                     |         | ref                    |         |
|          |                 | Yes   | 1.623(0.145-18.159)    | 0.6945  | 1.535(0.127-18.597)    | 0.7363  | 1.737(0.108-27.935)     | 0.6969  | 1.492(0.064-34.551)    | 0.8031  |
|          | Type of surgery | wide  | ref                    |         | ref                    |         | ref                     |         | ref                    |         |
|          |                 | total | 1.402(0.045-43.279)    | 0.847   | 1.260(0.041-38.720)    | 0.8947  | 1.882(0.045-78.151)     | 0.7394  | 1.366(0.024-76.452)    | 0.8794  |
|          | DM              | No    | ref                    |         | ref                    |         | ref                     |         | ref                    |         |
|          |                 | Yes   | 1.318(0.042-40.943)    | 0.8748  | 0.768(0.016-37.915)    | 0.8942  | 2.480(0.060-102.400)    | 0.6324  | 2.377(0.016-347.461)   | 0.7335  |
|          | HTN             | No    | ref                    |         | ref                    |         | ref                     |         | ref                    |         |
|          |                 | Yes   | 0.548(0.018-16.817)    | 0.7309  | 0.502(0.022-11.474)    | 0.6659  | 0.887(0.021-36.690)     | 0.9497  | 0.918(0.024-34.833)    | 0.9634  |
|          | Hyperlipidemia  | No    | ref                    |         | ref                    |         | ref                     |         | ref                    |         |
|          |                 | Yes   | 0.524(0.016-16.796)    | 0.7146  | 0.709(0.030-16.600)    | 0.8308  | 0.999(0.024-41.236)     | 0.9996  | 1.401(0.033-58.778)    | 0.8595  |
|          | COPD            | No    | ref                    |         | ref                    |         | ref                     |         | ref                    |         |
|          |                 | Yes   | 7.241(0.231-226.852)   | 0.26    | 5.974(0.128-278.698)   | 0.3619  | 9.333(0.223-390.384)    | 0.241   | 8.312(0.072-959.150)   | 0.382   |
|          | CKD             | No    | ref                    |         | ref                    |         | ref                     |         | ref                    |         |
|          |                 | Yes   | 18.456(0.578-589.335)  | 0.099   | 30.714(0.486-1942.436) | 0.1055  | 23.471(0.499-1105.018)  | 0.1083  | 26.428(0.118-5930.250) | 0.2358  |
|          | Liver cirrhosis | No    | ref                    |         | ref                    |         | ref                     |         | ref                    |         |
|          |                 | Yes   | 91.578(1.937-4329.566) | 0.0217  | 26.657(0.167-4256.072) | 0.2047  | 227.450(2.450-21113.50) | 0.0189  | 91.020(0.081-102607.0) | 0.2083  |
|          | Heart failure   | No    | ref                    |         | ref                    |         | ref                     |         | ref                    |         |
|          |                 | Yes   | 12.831(0.414-397.935)  | 0.1453  | 19.012(0.472-766.009)  | 0.1184  | 13.108(0.310-555.062)   | 0.1782  | 15.576(0.162-1499.680) | 0.2387  |
|          | Age             |       | 0.969(0.858-1.094)     | 0.6066  | 1.015(0.903-1.140)     | 0.8075  | 0.942(0.806-1.100)      | 0.4509  | 0.983(0.842-1.148)     | 0.8277  |

HR, hazard ratio; CI, confidence interval; BCS, breast conserving surgery; DM, diabetes; HTN, hypertension; COPD, chronic obstructive pulmonary disease; CKD, chronic kidney disease

Yellow box highlights the p-value less than 0.05, considered significant.

**Supplementary Table S13. Risk factors of non-Hodgkin lymphoma**

| outcome              | Variable        |       | Before matching       |         |                       |         | After matching         |         |                        |         |
|----------------------|-----------------|-------|-----------------------|---------|-----------------------|---------|------------------------|---------|------------------------|---------|
|                      |                 |       | Univariable model     |         | Multivariable model   |         | Univariable model      |         | Multivariable model    |         |
|                      |                 |       | HR(95% CI)            | p-value | HR(95% CI)            | p-value | HR(95% CI)             | P-value | HR(95% CI)             | p-value |
| non-Hodgkin lymphoma | Tamoxifen       | No    | ref                   |         | ref                   |         | ref                    |         | ref                    |         |
|                      |                 | Yes   | 0.934(0.208-4.196)    | 0.9287  | 0.900(0.195-4.150)    | 0.892   | 0.403(0.042-3.897)     | 0.4322  | 0.492(0.051-4.801)     | 0.5421  |
|                      | Type of surgery | wide  | ref                   |         | ref                   |         | ref                    |         | ref                    |         |
|                      |                 | total | 0.588(0.028-12.544)   | 0.7336  | 0.496(0.024-10.093)   | 0.6484  | 0.827(0.032-21.680)    | 0.9091  | 0.709(0.026-19.555)    | 0.8392  |
|                      | DM              | No    | ref                   |         | ref                   |         | ref                    |         | ref                    |         |
|                      |                 | Yes   | 1.401(0.168-11.665)   | 0.755   | 1.019(0.144-7.194)    | 0.9849  | 3.364(0.349-32.453)    | 0.2941  | 1.114(0.102-12.188)    | 0.9298  |
|                      | HTN             | No    | ref                   |         | ref                   |         | ref                    |         | ref                    |         |
|                      |                 | Yes   | 2.752(0.616-12.299)   | 0.185   | 2.115(0.367-12.198)   | 0.402   | 11.752(1.222-113.007)  | 0.0329  | 5.261(0.438-63.255)    | 0.1907  |
|                      | Hyperlipidemia  | No    | ref                   |         | ref                   |         | ref                    |         | ref                    |         |
|                      |                 | Yes   | 0.514(0.061-4.293)    | 0.5386  | 0.312(0.043-2.288)    | 0.2521  | 1.113(0.115-10.773)    | 0.9264  | 0.403(0.039-4.146)     | 0.4451  |
|                      | COPD            | No    | ref                   |         | ref                   |         | ref                    |         | ref                    |         |
|                      |                 | Yes   | 3.174(0.147-68.752)   | 0.4617  | 1.836(0.093-36.139)   | 0.6893  | 4.558(0.172-120.644)   | 0.3641  | 2.110(0.080-55.561)    | 0.6546  |
|                      | CKD             | No    | ref                   |         | ref                   |         | ref                    |         | ref                    |         |
|                      |                 | Yes   | 8.943(0.413-193.699)  | 0.1626  | 4.393(0.175-110.024)  | 0.3678  | 15.735(0.591-419.114)  | 0.0998  | 5.750(0.131-252.655)   | 0.3648  |
|                      | Liver cirrhosis | No    | ref                   |         | ref                   |         | ref                    |         | ref                    |         |
|                      |                 | Yes   | 25.678(1.164-566.705) | 0.0398  | 21.126(0.794-562.023) | 0.0684  | 59.073(2.010-1736.340) | 0.018   | 38.143(0.302-4815.601) | 0.1402  |
|                      | Heart failure   | No    | ref                   |         | ref                   |         | ref                    |         | ref                    |         |
|                      |                 | Yes   | 7.485(0.349-160.601)  | 0.1982  | 1.935(0.074-50.685)   | 0.6919  | 12.801(0.487-336.586)  | 0.1264  | 0.877(0.013-57.828)    | 0.9512  |
|                      | Age             |       | 1.067(1.001-1.137)    | 0.048   | 1.074(0.997-1.157)    | 0.0586  | 1.107(1.019-1.203)     | 0.0158  | 1.091(0.987-1.206)     | 0.0874  |

HR, hazard ratio; CI, confidence interval; BCS, breast conserving surgery; DM, diabetes; HTN, hypertension; COPD, chronic obstructive pulmonary disease; CKD, chronic kidney disease

Yellow box highlights the p-value less than 0.05, considered significant.

**Supplementary Table S14. Risk factors of other cancer**

| outcome | Variable        |       | Before matching     |         |                     |         | After matching       |         |                      |         |
|---------|-----------------|-------|---------------------|---------|---------------------|---------|----------------------|---------|----------------------|---------|
|         |                 |       | Univariable model   |         | Multivariable model |         | Univariable model    |         | Multivariable model  |         |
|         |                 |       | HR(95% CI)          | p-value | HR(95% CI)          | p-value | HR(95% CI)           | p-value | HR(95% CI)           | p-value |
| Other   | Tamoxifen       | No    | ref                 |         | ref                 |         | ref                  |         | ref                  |         |
|         |                 | Yes   | 1.510(0.789-2.889)  | 0.2136  | 1.461(0.764-2.792)  | 0.2515  | 1.388(0.666-2.890)   | 0.3817  | 1.373(0.658-2.863)   | 0.3986  |
|         | Type of surgery | wide  | ref                 |         | ref                 |         | ref                  |         | ref                  |         |
|         |                 | total | 0.406(0.098-1.678)  | 0.2131  | 0.479(0.133-1.720)  | 0.2589  | 0.537(0.128-2.258)   | 0.3961  | 0.643(0.174-2.376)   | 0.5076  |
|         | DM              | No    | ref                 |         | ref                 |         | ref                  |         | ref                  |         |
|         |                 | Yes   | 1.227(0.518-2.904)  | 0.6419  | 0.910(0.370-2.234)  | 0.8362  | 1.521(0.529-4.374)   | 0.4361  | 1.123(0.375-3.365)   | 0.8363  |
|         | HTN             | No    | ref                 |         | ref                 |         | ref                  |         | ref                  |         |
|         |                 | Yes   | 1.882(1.009-3.511)  | 0.0467  | 1.657(0.790-3.475)  | 0.1811  | 2.368(1.118-5.013)   | 0.0243  | 2.242(0.921-5.455)   | 0.0751  |
|         | Hyperlipidemia  | No    | ref                 |         | ref                 |         | ref                  |         | ref                  |         |
|         |                 | Yes   | 1.150(0.601-2.202)  | 0.6731  | 0.838(0.411-1.708)  | 0.6262  | 1.398(0.635-3.076)   | 0.405   | 1.048(0.445-2.467)   | 0.9143  |
|         | COPD            | No    | ref                 |         | ref                 |         | ref                  |         | ref                  |         |
|         |                 | Yes   | 0.469(0.028-7.876)  | 0.5991  | 0.361(0.023-5.604)  | 0.4668  | 0.658(0.038-11.315)  | 0.7731  | 0.544(0.038-7.849)   | 0.6548  |
|         | CKD             | No    | ref                 |         | ref                 |         | ref                  |         | ref                  |         |
|         |                 | Yes   | 2.776(0.382-20.175) | 0.313   | 3.470(0.671-17.948) | 0.1378  | 4.678(0.636-34.394)  | 0.1295  | 4.334(0.760-24.722)  | 0.0988  |
|         | Liver cirrhosis | No    | ref                 |         | ref                 |         | ref                  |         | ref                  |         |
|         |                 | Yes   | 3.886(0.231-65.351) | 0.3459  | 2.243(0.144-35.018) | 0.5645  | 7.204(0.415-125.001) | 0.175   | 7.162(0.462-110.936) | 0.1591  |
|         | Heart failure   | No    | ref                 |         | ref                 |         | ref                  |         | ref                  |         |
|         |                 | Yes   | 2.603(0.358-18.908) | 0.3444  | 3.570(0.722-17.650) | 0.1186  | 1.935(0.112-33.299)  | 0.6494  | 1.454(0.107-19.777)  | 0.7785  |
|         | Age             |       | 1.025(0.997-1.054)  | 0.0774  | 1.022(0.989-1.056)  | 0.1954  | 1.020(0.986-1.055)   | 0.2493  | 1.007(0.968-1.048)   | 0.7348  |

HR, hazard ratio; CI, confidence interval; BCS, breast conserving surgery; DM, diabetes; HTN, hypertension; COPD, chronic obstructive pulmonary disease; CKD, chronic kidney disease

Yellow box highlights the p-value less than 0.05, considered significant.
