# Supplementary figures and images for: Risk of Secondary Cancer after Adjuvant Tamoxifen Treatment for Ductal Carcinoma In Situ: A Nationwide Cohort Study in South Korea
Source: MDPI journal article supplement (doi:10.3390/diagnostics13040792), 2023-02-20

### a. Multivariate analysis before matching

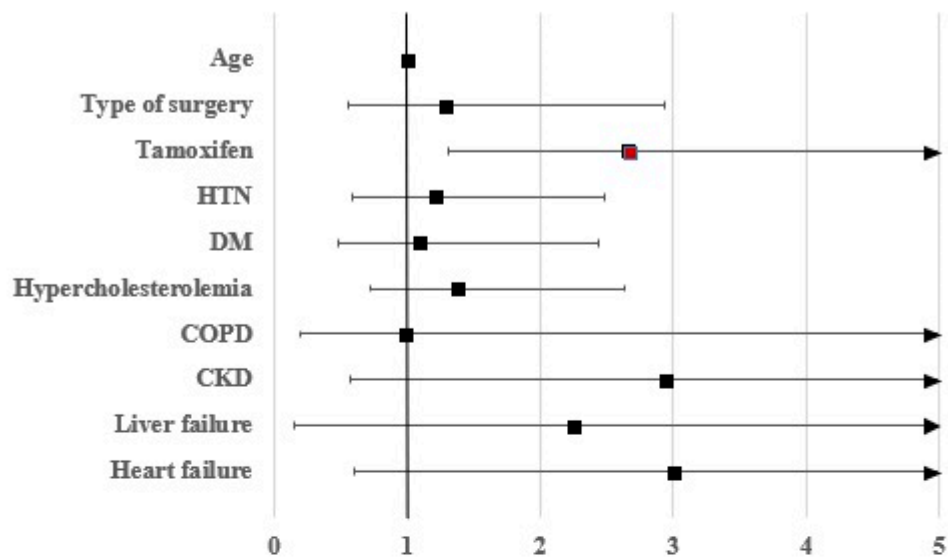

### b. Multivariate analysis after matching

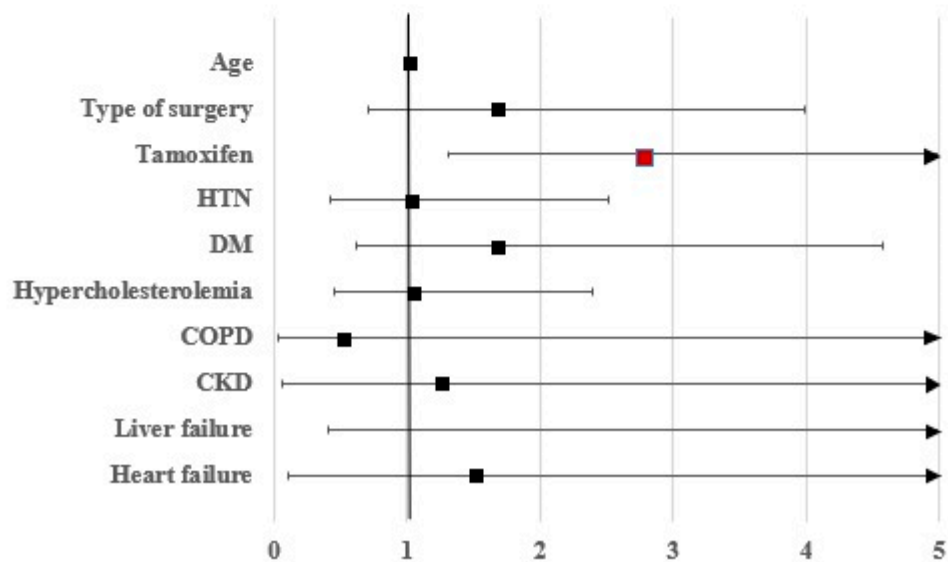

Supplement: s1 [file s1]
